# Supplementary material for: Dynamic gel as artificial interphase layer for ultrahigh-rate and large-capacity lithium metal anode
Source: Springer Nature journal article supplement (doi:10.1038/s41467-023-39636-6), 2023-07-07
Supplement: MOESM1 [file 41467_2023_39636_MOESM1_ESM.pdf]

## Supplementary Information

### Dynamic Gel as Artificial Interphase Layer for Ultrahigh-rate and Large-capacity Lithium Metal Anode

Chao Chen<sup>1</sup>, Jiaming Zhang<sup>1</sup>, Benrui Hu<sup>1</sup>, Qianwen Liang<sup>1</sup>, Xunhui Xiong<sup>1\*</sup>

<sup>1</sup>School of Environment and Energy, South China University of Technology, Guangzhou 510006, China

E-mail addresses: esxxiong@scut.edu.cn (Xunhui Xiong)

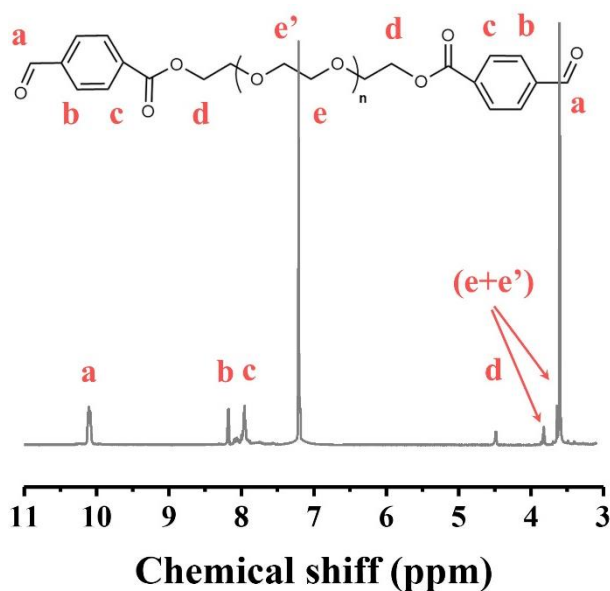

Supplementary Figure 1. <sup>1</sup>H NMR spectrum of DF-PEG-DF in CDCl<sub>3</sub>.

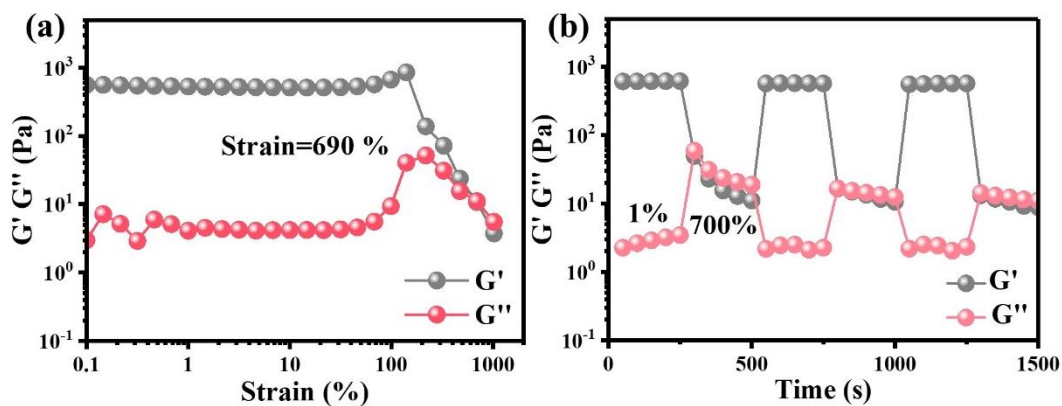

Supplementary Figure 2. (a) The strain-dependent  $G'$  and  $G''$  of the CS/DF-PEG-DF gel by strain sweep experiments (frequency: 1.0 Hz); (b) The self-healing behavior of

the CS/DF-PEG-DF gel by the damage-healing cycles.

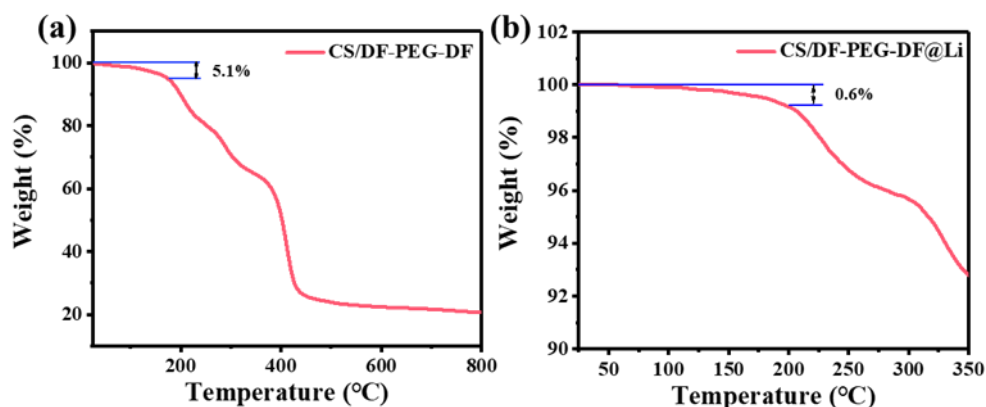

**Supplementary Figure 3.** Thermogravimetric Analysis (TGA) results of (a) CS/DF-PEG-DF film and (b) CS/DF-PEG-DF@Li.

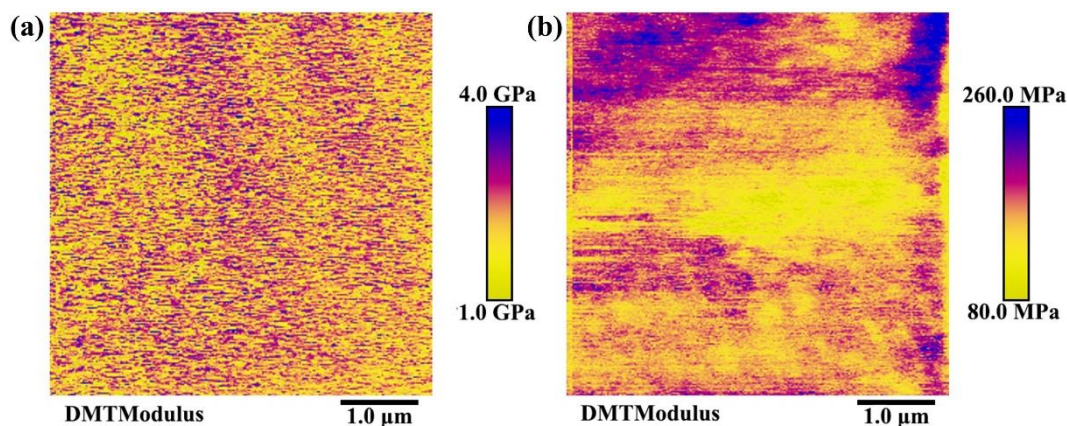

**Supplementary Figure 4.** Elastic modulus mapping of (a) CS and (b) DF-PEG-DF.

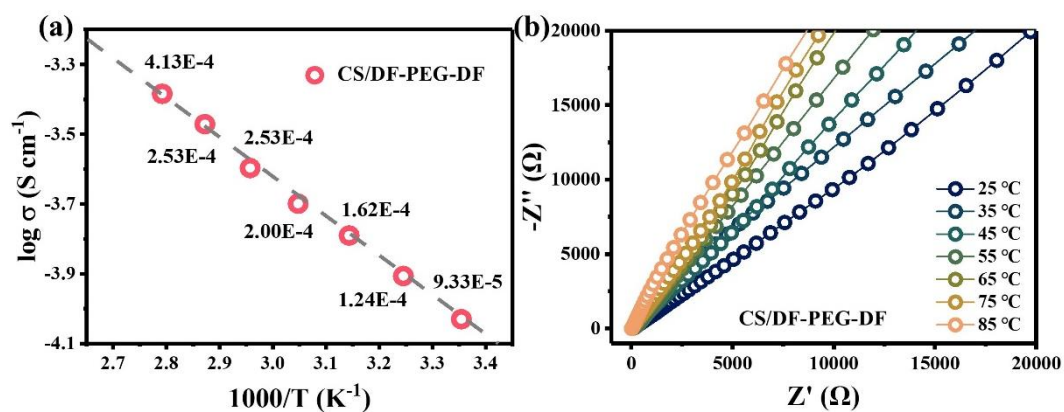

**Supplementary Figure 5.** (a) Temperature dependence of ionic conductivity of CS/DF-PEG-DF; (b) The impedance spectra of CS/DF-PEG-DF films at various temperatures from 25 to 85 °C.

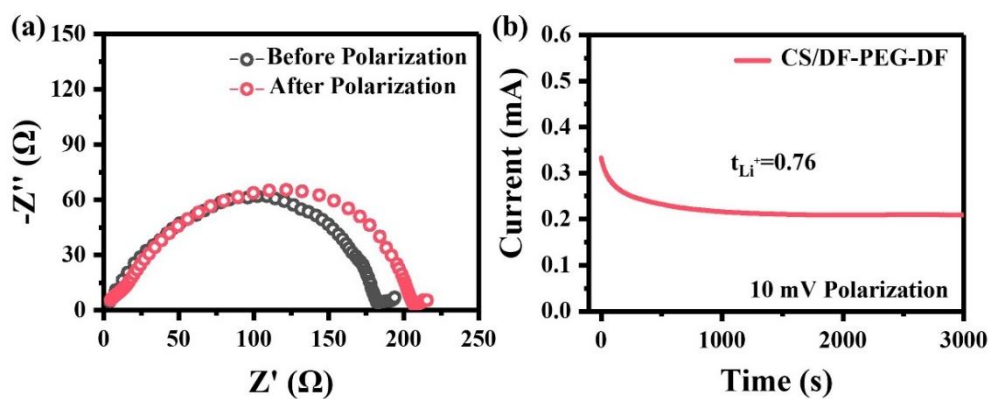

**Supplementary Figure 6.** (a) Electrochemical impedance spectroscopy (EIS) for the Li||Li cells before and after measured by the chronoamperometry experiment; (b) Chronoamperometry curves of Li||CS-DF-PEG-DF||Li with a static potential of 10 mV.

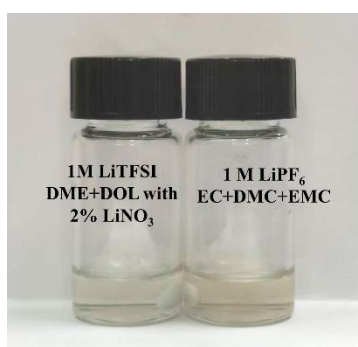

**Supplementary Figure 7.** Solubility of DF-PEG-DF in different electrolyte (add 0.1 g DF-PEG-DF to 1 ml electrolyte).

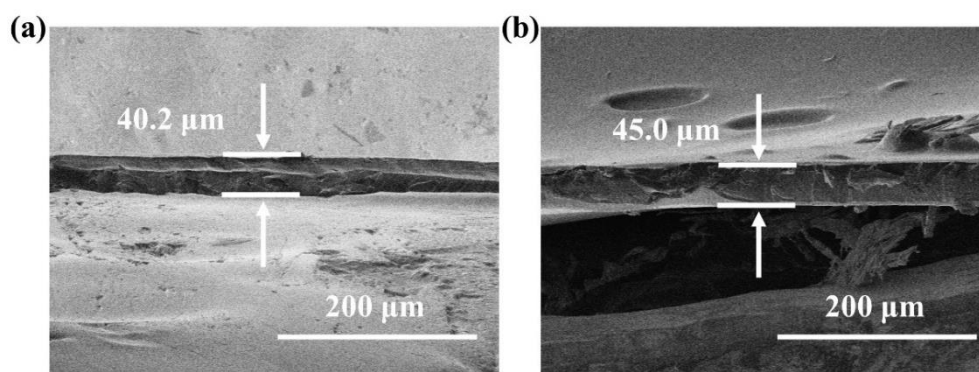

**Supplementary Figure 8.** Cross-section SEM images of CS/DF-PEG-DF (a) before and (b) after 5 days of immersion in ester electrolyte. It can be seen that there is no obvious swelling of CS/DF-PEG-DF film after soaking.

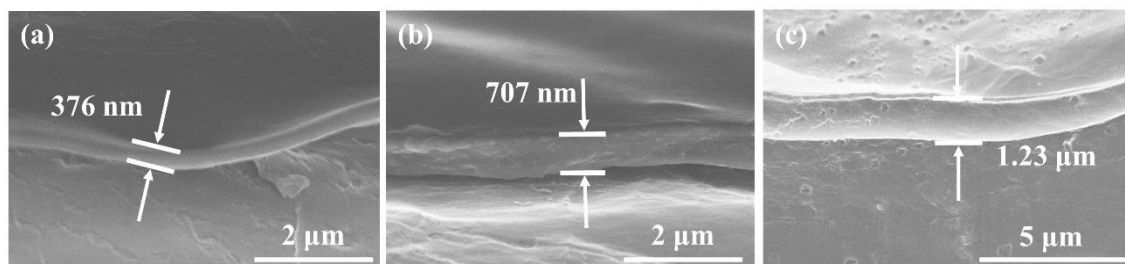

**Supplementary Figure 9.** SEM images of CS/DF-PEG-DF@Li fabricated by adding (a) 100  $\mu\text{L}$ , (b) 200  $\mu\text{L}$ , (c) 400  $\mu\text{L}$  of CS/DF-PEG-DF/DMSO solution on Li metal.

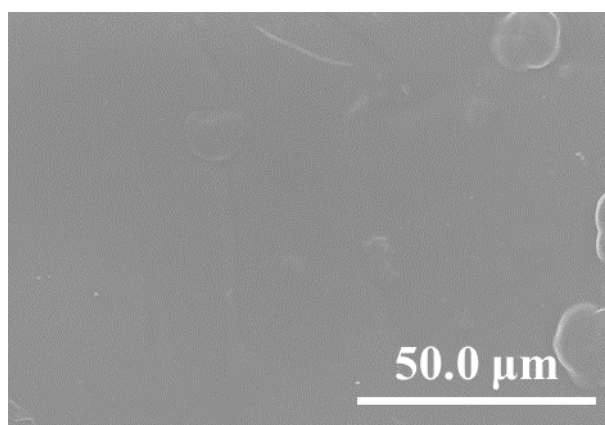

**Supplementary Figure 10.** SEM images of CS/DF-PEG-DF@Li anode.

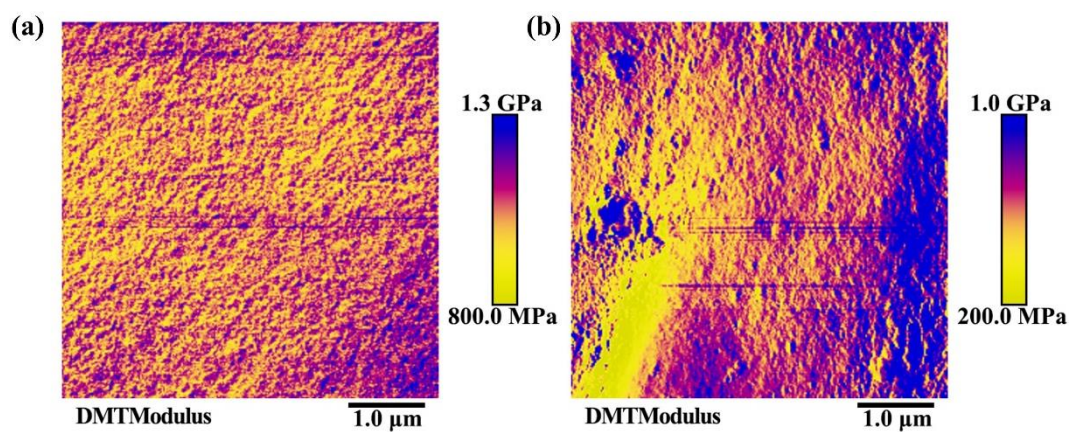

**Supplementary Figure 11.** Elastic modulus mapping of (a) CS/DF-PEG-DF@Li and (b) CS/DF-PEG-DF@Li after 24 h immersion in electrolyte.

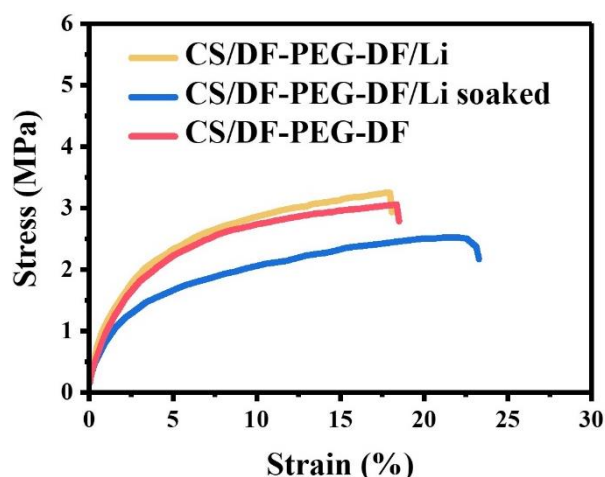

**Supplementary Figure 12.** Stress-strain curves of CS/DF-PEG-DF film, CS/DF-PEG-DF film after reaction with lithium metal (CS/DF-PEG-DF/Li), and CS/DF-PEG-DF/Li immersed in electrolyte for 24 h (CS/DF-PEG-DF/Li soaked).

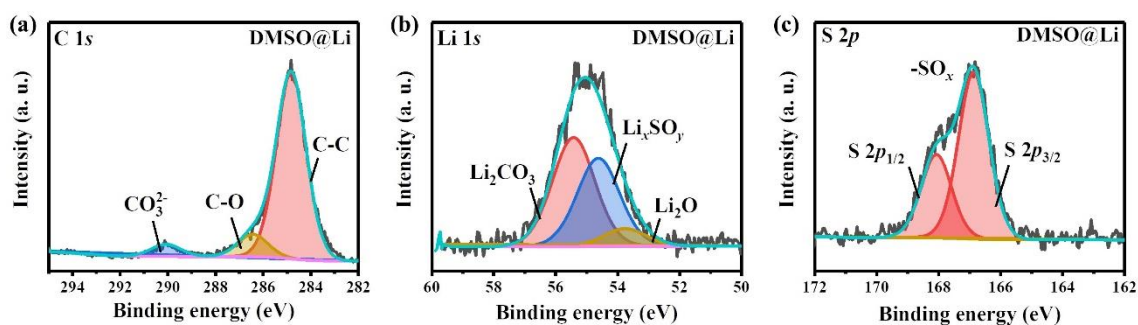

**Supplementary Figure 13.** XPS spectra of DMSO treated Li foil (DMSO@Li). The high-resolution XPS spectra of (a) C 1s, (b) Li 1s, and (c) S 2p for DMSO@Li.

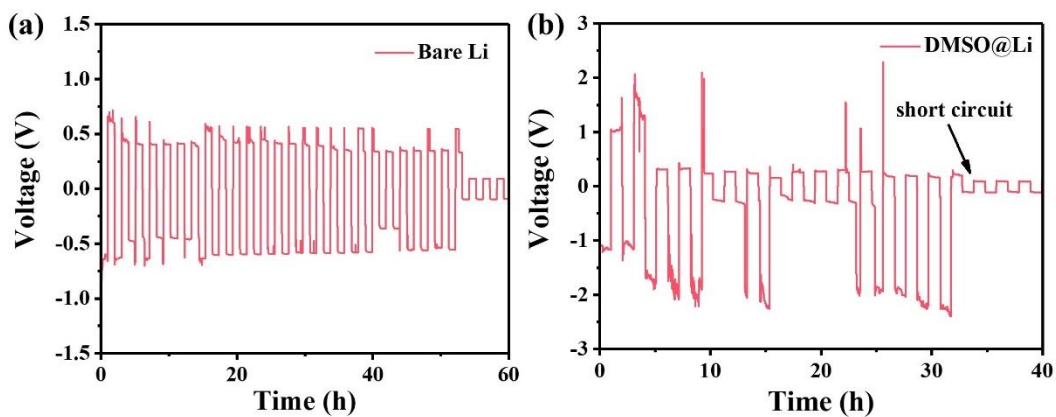

**Supplementary Figure 14.** Voltage profiles of (a) bare Li and (b) DMSO@Li anode

in symmetric cell at  $10 \text{ mA cm}^{-2}$  under a fixed capacity of  $10 \text{ mAh cm}^{-2}$ .

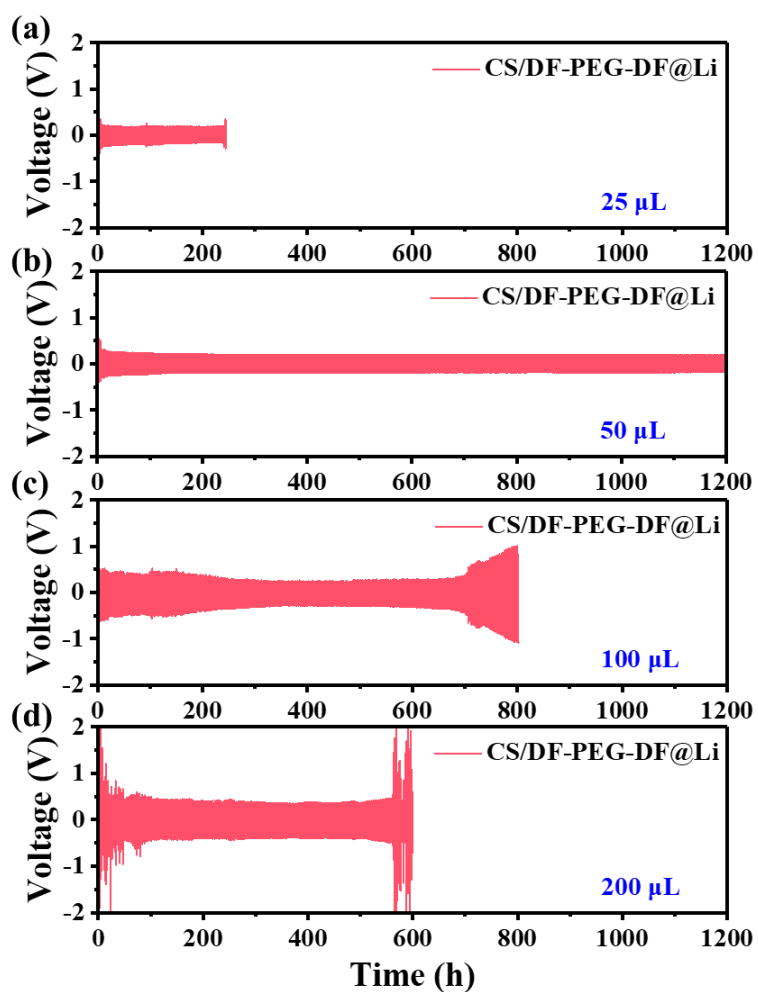

**Supplementary Figure 15.** (a-d) Symmetric cell cyclic stability comparison between CS/DF-PEG-DF@Li formed by adding different volumes of CS/DF-PEG-DF/DMSO solution at  $10 \text{ mA cm}^{-2}$  under a fixed capacity of  $10 \text{ mAh cm}^{-2}$ .

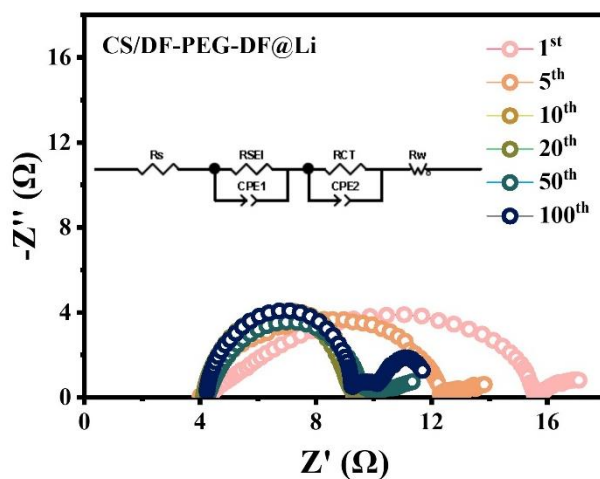

**Supplementary Figure 16.** EIS evolution of symmetric cells using CS/DF-PEG-

DF@Li anodes over 100 cycles.

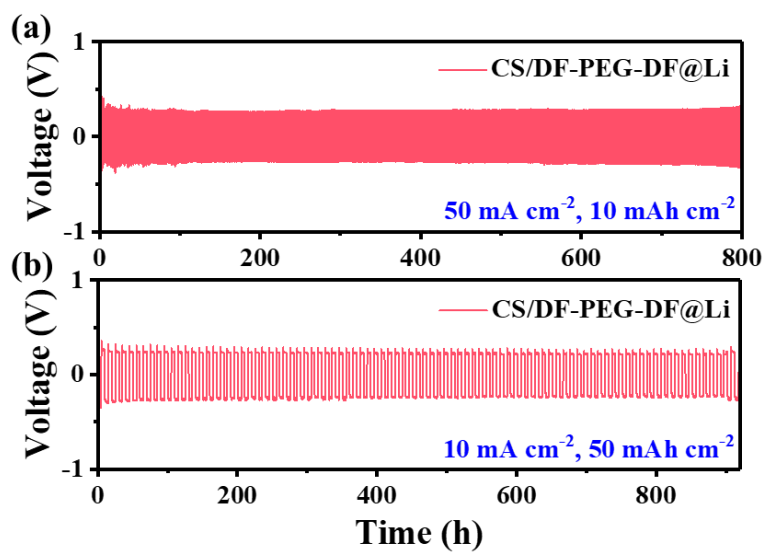

**Supplementary Figure 17.** Voltage profiles of CS/DF-PEG-DF@Li anodes in symmetric cell at (a) 50 mA cm<sup>-2</sup> under a fixed capacity of 10 mAh cm<sup>-2</sup> and (b) 10 mA cm<sup>-2</sup> under a fixed capacity of 50 mAh cm<sup>-2</sup>.

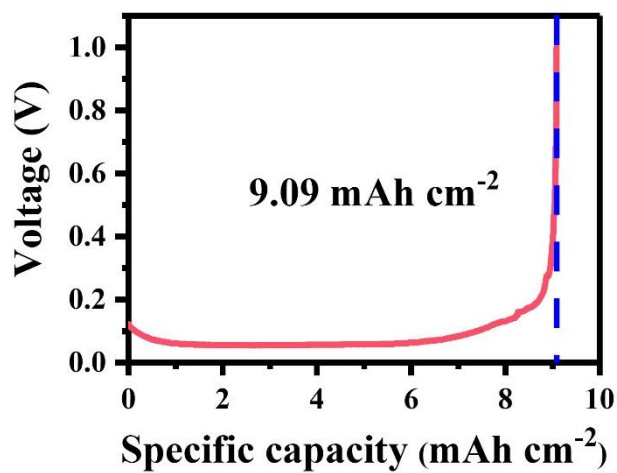

**Supplementary Figure 18.** Typical Li stripping curve of the thin Li anode (50 μm in thickness).

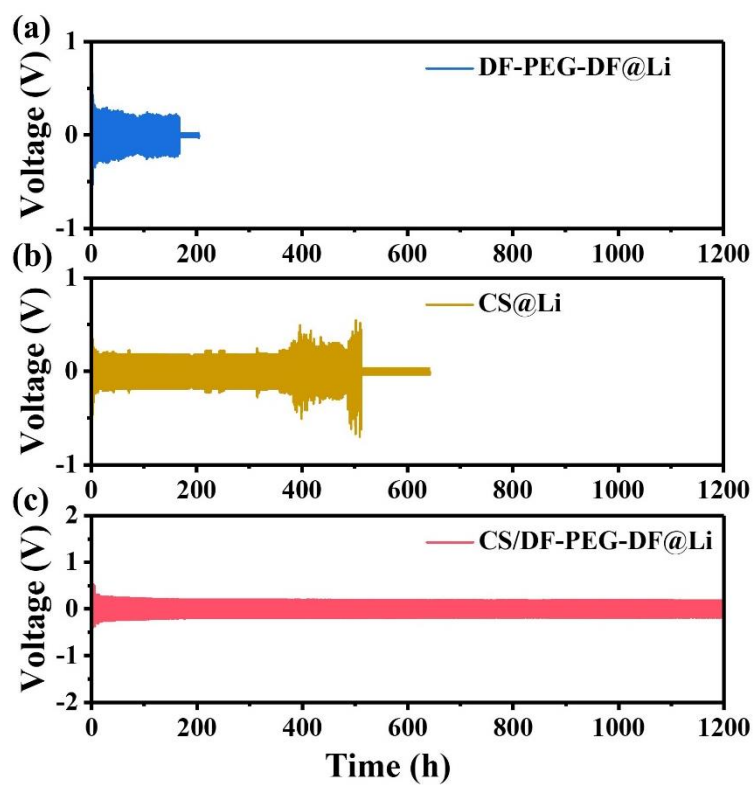

**Supplementary Figure 19.** Cycle stability of symmetrical cells employing (a) DF-PEG-DF@Li, (b) CS@Li, and (c) CS/DF-PEG-DF@Li at  $10 \text{ mA cm}^{-2}$  under a fixed capacity of  $10 \text{ mAh cm}^{-2}$ .

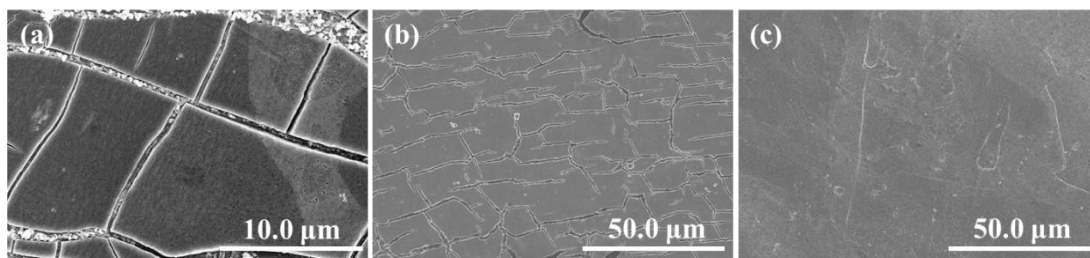

**Supplementary Figure 20.** SEM images of the (a) DF-PEG-DF@Li, (b) CS@Li, and (c) CS/DF-PEG-DF@Li anodes after 50 cycles at  $10 \text{ mA cm}^{-2}$ .

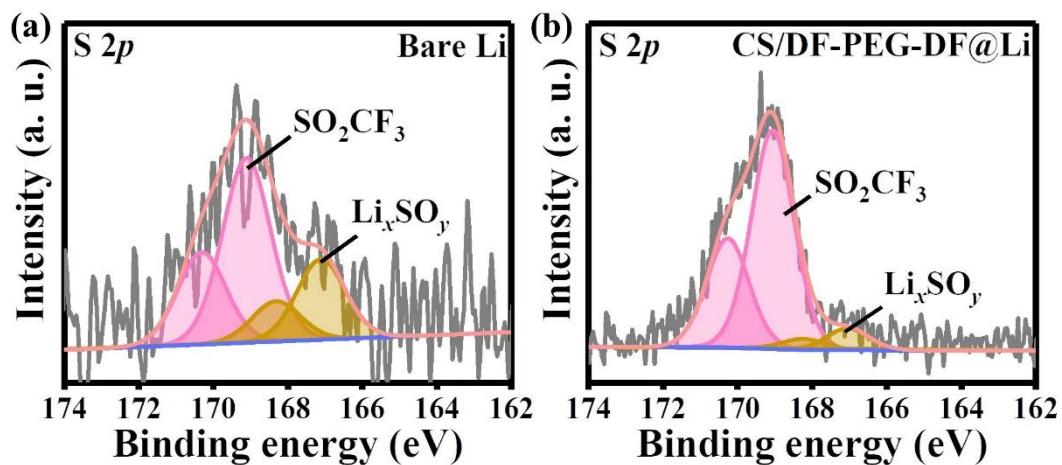

**Supplementary Figure 21.** S 2p XPS spectra of (a) bare Li and (b) CS/DF-PEG-DF@Li anodes after 10 cycles at  $10 \text{ mA cm}^{-2}$  under a capacity of  $10 \text{ mAh cm}^{-2}$ .

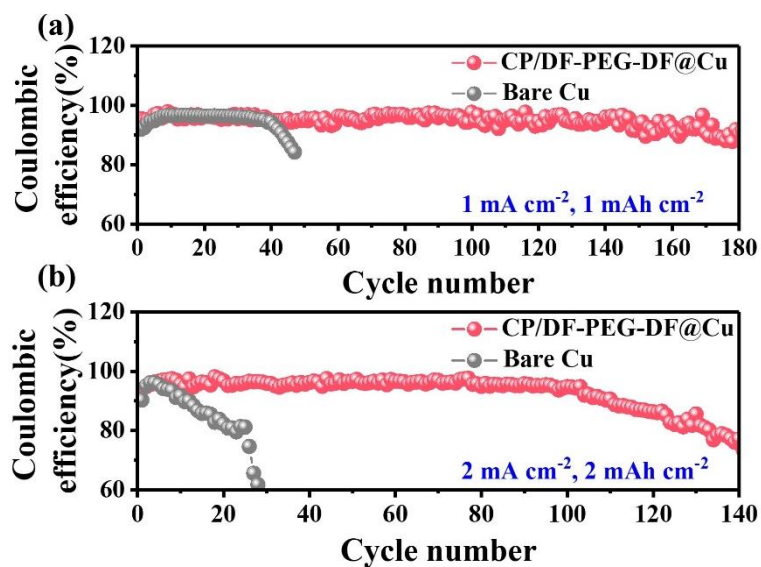

**Supplementary Figure 22.** CEs of bare Cu and CS/DF-PEG-DF@Cu electrodes with different capacities and different current densities in ether electrolyte.

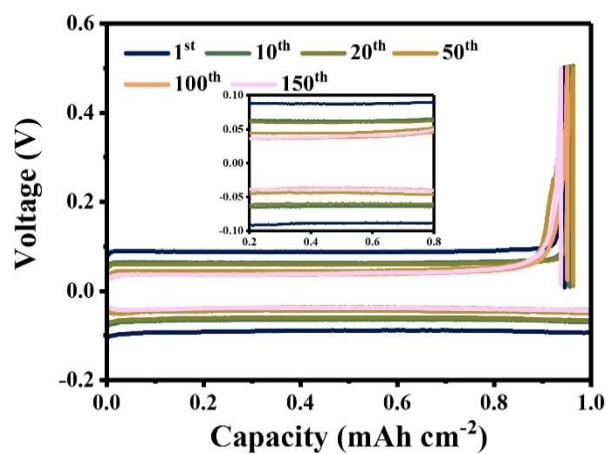

**Supplementary Figure 23.** Typical voltage profiles of Li||CS/DF-PEG-DF@Cu cell at  $1 \text{ mA cm}^{-2}$  under a fixed capacity of  $1 \text{ mAh cm}^{-2}$ .

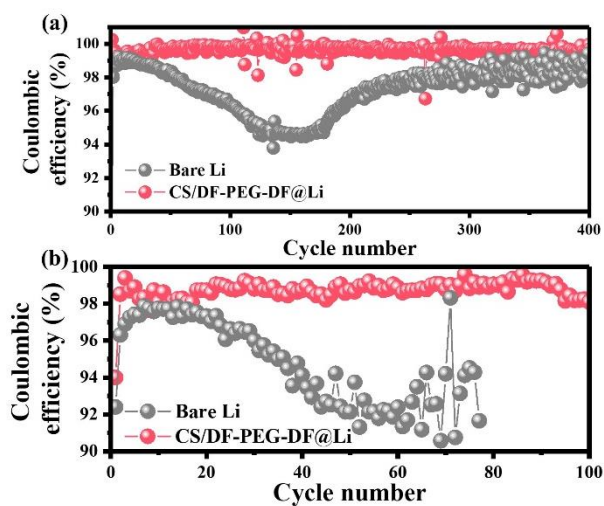

**Supplementary Figure 24.** CEs of (a) Li||S and (b) Li||LFP full cells.

**Supplementary Table 1.** Cyclic stability comparison of our CS/DF-PEG-DF@Li anode with the reported modified SEI in Li||Li symmetric cells.

| Modified SEI                                      | Current density<br>(mA cm <sup>-2</sup> ) | Areal capacity<br>(mAh cm <sup>-2</sup> ) | Cycle time<br>(h) | Ref.                 |
|---------------------------------------------------|-------------------------------------------|-------------------------------------------|-------------------|----------------------|
| organophosphate-derived<br>dual-layered interface | 1                                         | 1                                         | 2000              | 1                    |
| multiwall carbon<br>nanotubes (MWCNT)             | 2                                         | 2                                         | 2000              | 2                    |
| Mg@C <sub>60</sub>                                | 3                                         | 1                                         | 180               | 3                    |
| Ge-THF-treated Li                                 | 3                                         | 1                                         | 375               | 4                    |
| hybrid polyurea film                              | 5                                         | 1                                         | 85                | 5                    |
| LiF                                               | 5                                         | 1                                         | 500               | 6                    |
| Li <sub>2</sub> S <sub>x</sub>                    | 5                                         | 5                                         | 150               | 7                    |
| Li-Nafion/LiCl                                    | 8                                         | 1                                         | 120               | 8                    |
| Graphite fluoride-LiF                             | 10                                        | 1                                         | 33                | 9                    |
| CNT with ZnO                                      | 10                                        | 1                                         | 100               | 10                   |
| Al-Li alloy/LiCl                                  | 10                                        | 5                                         | 300               | 11                   |
| MgO                                               | 10                                        | 5                                         | 2500              | 12                   |
| xPCMS-g-PEGMA/LN                                  | 10                                        | 10                                        | 2800              | 13                   |
| Li-Hg alloy                                       | 12                                        | 12                                        | 200               | 14                   |
| Li/Al <sub>4</sub> Li <sub>9</sub> -LiF           | 20                                        | 1                                         | 10                | 15                   |
| LiPEO-UPy layer                                   | 20                                        | 1                                         | 400               | 16                   |
| Li <sub>3</sub> Sb/LiF                            | 20                                        | 2                                         | 320               | 17                   |
| Li/Li <sub>22</sub> Sn <sub>5</sub>               | 30                                        | 5                                         | 66.67             | 18                   |
| MXene layer                                       | 35                                        | 1                                         | 420               | 19                   |
| <b>CS/DF-PEG-DF</b>                               | <b>10</b>                                 | <b>10</b>                                 | <b>3200</b>       | <b>This<br/>work</b> |
|                                                   | <b>50</b>                                 | <b>50</b>                                 | <b>600</b>        |                      |

**Supplementary Table 2.** Li utilization comparison of our CS/DF-PEG-DF@Li anode with the reported literature in Li||Li symmetric cells.

| Composite anode        | Max areal capacity<br>(mAh cm <sup>-2</sup> ) | Li loading<br>(mAh cm <sup>-2</sup> ) | Li utilization<br>(%) | Ref.             |
|------------------------|-----------------------------------------------|---------------------------------------|-----------------------|------------------|
| PI-ZnO Li              | 3                                             | 26.3                                  | 11.4                  | 20               |
| MgO@WC                 | 3.5                                           | 20.0                                  | 17.5                  | 21               |
| CG host                | 1                                             | 4.0                                   | 25.0                  | 22               |
| CNF-TiN                | 1                                             | 3.0                                   | 33.3                  | 23               |
| PA-MXene-Li            | 20                                            | 43.0                                  | 46.5                  | 19               |
| CF/Ag-Li               | 10                                            | 21.0                                  | 47.6                  | 24               |
| N-doped graphene Li    | 12                                            | 23.6                                  | 50.8                  | 25               |
| D-Cu@CuSe              | 5                                             | 8.0                                   | 62.5                  | 26               |
| Li@MnZnO/CNF           | 10                                            | 14.3                                  | 70.0                  | 27               |
| Cu/Li                  | 6                                             | 8.0                                   | 75.0                  | 28               |
| <b>CS/DF-PEG-DF@Li</b> | <b>8</b>                                      | <b>9.1</b>                            | <b>88.0</b>           | <b>This work</b> |

### Supplementary references

1. Liu, X., Liu, J., Qian, T., Chen, H. & Yan C. Novel Organophosphate-Derived Dual-Layered Interface Enabling Air-Stable and Dendrite-Free Lithium Metal Anode. *Adv. Mater.* **32**, 1902724 (2020).
2. Salvatierra, R. V. et al. Suppressing Li Metal Dendrites Through a Solid Li-Ion Backup Layer. *Adv. Mater.* **30**, 1803869 (2018).
3. Xu, Q. et al. Air-Stable and Dendrite-Free Lithium Metal Anodes Enabled by a Hybrid Interphase of C60 and Mg. *Adv. Energy Mater.* **10**, 1903292 (2020).
4. Liao, K. et al. Developing a “Water-Defendable” and “Dendrite-Free” Lithium-Metal Anode Using a Simple and Promising GeCl<sub>4</sub> Pretreatment Method. *Adv. Mater.* **30**, 1705711 (2018).
5. Sun, Y. et al. Tailoring the Mechanical and Electrochemical Properties of an Artificial Interphase for High-Performance Metallic Lithium Anode. *Adv. Energy Mater.* **10**, 2001139 (2020).
6. Lang, J. et al. One-pot solution coating of high quality LiF layer to stabilize Li metal anode. *Energy Storage Mater.* **16**, 85-90 (2019).
7. Jiang, Z. et al. Facile Generation of Polymer-Alloy Hybrid Layers for Dendrite-Free Lithium-Metal Anodes with Improved Moisture Stability. *Angew. Chem.-Int. Edit.* **58**,

11374-11378 (2019).

8. Li, S., Fan, L. & Lu, Y. Rational design of robust-flexible protective layer for safe lithium metal battery. *Energy Storage Mater.* **18**, 205-212 (2019).
9. Shen, X. et al. Lithium anode stable in air for low-cost fabrication of a dendrite-free lithium battery. *Nat. Commun.* **10**, 900 (2019).
10. Zhang, H. et al. Lithiophilic-lithiophobic gradient interfacial layer for a highly stable lithium metal anode. *Nat. Commun.* **9**, 3729 (2018).
11. Lu, Z. et al. Constructing a High-Strength Solid Electrolyte Layer by In Vivo Alloying with Aluminum for an Ultrahigh-Rate Lithium Metal Anode. *Adv. Funct. Mater.* **30**, 1907343 (2020).
12. Zhou, Y. et al. Redistributing Li-Ion Flux by Parallelly Aligned Holey Nanosheets for Dendrite-Free Li Metal Anodes. *Adv. Mater.* **32**, 2003920 (2020).
13. Li, S. et al. A robust all-organic protective layer towards ultrahigh-rate and large-capacity Li metal anodes. *Nat. Nanotechnol.* **17**, 613-621 (2022).
14. He, G., Li, Q., Shen, Y. & Ding, Y. Flexible Amalgam Film Enables Stable Lithium Metal Anodes with High Capacities. *Angew. Chem.-Int. Edit.* **58**, 18466-18470 (2019).
15. Wang, H., Lin, D., Liu, Y., Li, Y. & Cui, Y. Ultrahigh-current density anodes with interconnected Li metal reservoir through overlithiation of mesoporous  $\text{AlF}_3$  framework. *Sci. Adv.* **3**, e1701301 (2017).
16. Wang, G. et al. Self-Stabilized and Strongly Adhesive Supramolecular Polymer Protective Layer Enables Ultrahigh-Rate and Large-Capacity Lithium-Metal Anode. *Angew. Chem.-Int. Edit.* **59**, 2055-2060 (2020).
17. Hu, A. et al. An artificial hybrid interphase for an ultrahigh-rate and practical lithium metal anode. *Energy Environ. Sci.* **14**, 4115-4124 (2021).
18. Wan, M. et al. Mechanical rolling formation of interpenetrated lithium metal/lithium tin alloy foil for ultrahigh-rate battery anode. *Nat. Commun.* **11**, 829 (2020).
19. Zhang, D., Wang, S., Li, B., Gong, Y. & Yang, S. Horizontal Growth of Lithium on Parallelly Aligned MXene Layers towards Dendrite-Free Metallic Lithium Anodes. *Adv. Mater.* **31**, 1901820 (2019).
20. Liu, Y. et al. Lithium-coated polymeric matrix as a minimum volume-change and dendrite-free lithium metal anode. *Nat. Commun.* **7**, 10992 (2016).
21. Jin, C. et al. Metal oxide nanoparticles induced step-edge nucleation of stable Li metal anode working under an ultrahigh current density of  $15 \text{ mA cm}^{-2}$ . *Nano Energy* **45**, 203-209 (2018).
22. Hong, S.-H. et al. Electrical Conductivity Gradient Based on Heterofibrous Scaffolds for Stable Lithium-Metal Batteries. *Adv. Funct. Mater.* **30**, 1908868 (2020).
23. Lin, K. et al. Ultrafine Titanium Nitride Sheath Decorated Carbon Nanofiber Network Enabling Stable Lithium Metal Anodes. *Adv. Funct. Mater.* **29**, 1903229 (2019).
24. Zhang, R. et al. Coraloid Carbon Fiber-Based Composite Lithium Anode for Robust Lithium Metal Batteries. *Joule* **2**, 764-777 (2018).
25. Gao, Y. et al. Polymer-inorganic solid-electrolyte interphase for stable lithium metal batteries under lean electrolyte conditions. *Nat. Mater.* **18**, 384-389 (2019).
26. Shi, Z. et al. Synergizing Conformal Lithiophilic Granule and Dealloyed Porous Skeleton toward Pragmatic Li Metal Anodes. *Small Science* **2**, 2100110 (2022).

27. Le, T. et al. Deeply Cyclable and Ultrahigh-Rate Lithium Metal Anodes Enabled by Coaxial Nanochamber Heterojunction on Carbon Nanofibers. *Adv. Sci.* **8**, 2101940 (2021).
28. Huang, S. et al. Self-Propagating Enabling High Lithium Metal Utilization Ratio Composite Anodes for Lithium Metal Batteries. *Nano Lett.* **21**, 791-797 (2021).
